# Supplementary material for: Unprecedented TPE-Embedded Butterfly Bis-Crown Ether with Controllable Conformation and Supramolecular Chiroptical Property
Source: Research Square preprint supplement (doi:10.21203/rs.3.rs-4143303/v2), 2024-04-11

## checkCIF/PLATON report

Structure factors have been supplied for datablock(s) 1a

THIS REPORT IS FOR GUIDANCE ONLY. IF USED AS PART OF A REVIEW PROCEDURE FOR PUBLICATION, IT SHOULD NOT REPLACE THE EXPERTISE OF AN EXPERIENCED CRYSTALLOGRAPHIC REFEREE.

No syntax errors found.      CIF dictionary      Interpreting this report

### Datablock: 1a

---

|                        |                                        |                                    |            |
|------------------------|----------------------------------------|------------------------------------|------------|
| Bond precision:        | C-C = 0.0080 Å                         | Wavelength=1.54178                 |            |
| Cell:                  | a=9.658(12)                            | b=25.56(4)                         | c=18.28(3) |
|                        | alpha=90                               | beta=90.99(6)                      | gamma=90   |
| Temperature:           | 100 K                                  |                                    |            |
|                        | Calculated                             | Reported                           |            |
| Volume                 | 4512(12)                               | 4511(12)                           |            |
| Space group            | P 21/c                                 | P 1 21/c 1                         |            |
| Hall group             | -P 2ybc                                | -P 2ybc                            |            |
| Moiety formula         | 2(C46 H52.50 K0.50 O12.50),<br>3(H2 O) | C46 H52.5 K0.5 O12.5,<br>1.5(H2 O) |            |
| Sum formula            | C92 H111 K O28                         | C46 H55.50 K0.50 O14               |            |
| Mr                     | 1703.91                                | 851.95                             |            |
| Dx, g cm <sup>-3</sup> | 1.254                                  | 1.254                              |            |
| Z                      | 2                                      | 4                                  |            |
| Mu (mm <sup>-1</sup> ) | 1.164                                  | 1.164                              |            |
| F000                   | 1812.0                                 | 1812.0                             |            |
| F000'                  | 1818.67                                |                                    |            |
| h, k, lmax             | 11, 31, 22                             | 11, 30, 22                         |            |
| Nref                   | 8729                                   | 8036                               |            |
| Tmin, Tmax             | 0.659, 0.673                           | 0.430, 0.753                       |            |
| Tmin'                  | 0.598                                  |                                    |            |

Correction method= # Reported T Limits: Tmin=0.430 Tmax=0.753  
AbsCorr = NONE

Data completeness= 0.921      Theta(max)= 71.030

|                               |                                    |
|-------------------------------|------------------------------------|
| R(reflections)= 0.1822( 5071) | wR2(reflections)=<br>0.4048( 8036) |
| S = 1.496                     | Npar= 559                          |



---

The following ALERTS were generated. Each ALERT has the format

**test-name\_ALERT\_alert-type\_alert-level.**

Click on the hyperlinks for more details of the test.

---

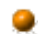

#### Alert level B

|                   |                                           |      |              |
|-------------------|-------------------------------------------|------|--------------|
| PLAT082_ALERT_2_B | High R1 Value .....                       | 0.18 | Report       |
| PLAT084_ALERT_3_B | High wR2 Value (i.e. > 0.25) .....        | 0.40 | Report       |
| PLAT149_ALERT_3_B | s.u. on the beta Angle is Too Large ..... | 0.06 | Degree       |
| PLAT420_ALERT_2_B | D-H Bond Without Acceptor O1 --H1C .      |      | Please Check |

---

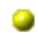

#### Alert level C

|                   |                                                  |         |              |
|-------------------|--------------------------------------------------|---------|--------------|
| PLAT029_ALERT_3_C | _diffn_measured_fraction_theta_full value Low .  | 0.967   | Why?         |
| PLAT042_ALERT_1_C | Calc. and Reported MoietyFormula Strings Differ  |         | Please Check |
| PLAT148_ALERT_3_C | s.u. on the a - Axis is (Too) Large ....         | 0.012   | Ang.         |
| PLAT148_ALERT_3_C | s.u. on the b - Axis is (Too) Large ....         | 0.0400  | Ang.         |
| PLAT148_ALERT_3_C | s.u. on the c - Axis is (Too) Large ....         | 0.030   | Ang.         |
| PLAT230_ALERT_2_C | Hirshfeld Test Diff for O00M --C01L .            | 5.6     | s.u.         |
| PLAT230_ALERT_2_C | Hirshfeld Test Diff for O010 --C01B .            | 5.2     | s.u.         |
| PLAT234_ALERT_4_C | Large Hirshfeld Difference O00M --C01D .         | 0.18    | Ang.         |
| PLAT234_ALERT_4_C | Large Hirshfeld Difference O00S --C01E .         | 0.19    | Ang.         |
| PLAT234_ALERT_4_C | Large Hirshfeld Difference O01A --C01P .         | 0.17    | Ang.         |
| PLAT241_ALERT_2_C | High 'MainMol' Ueq as Compared to Neighbors of   | C01F    | Check        |
| PLAT242_ALERT_2_C | Low 'MainMol' Ueq as Compared to Neighbors of    | O00I    | Check        |
| PLAT242_ALERT_2_C | Low 'MainMol' Ueq as Compared to Neighbors of    | O00M    | Check        |
| PLAT242_ALERT_2_C | Low 'MainMol' Ueq as Compared to Neighbors of    | O00V    | Check        |
| PLAT242_ALERT_2_C | Low 'MainMol' Ueq as Compared to Neighbors of    | O00Y    | Check        |
| PLAT260_ALERT_2_C | Large Average Ueq of Residue Including K016      | 0.114   | Check        |
| PLAT260_ALERT_2_C | Large Average Ueq of Residue Including O1        | 0.251   | Check        |
| PLAT260_ALERT_2_C | Large Average Ueq of Residue Including O2        | 0.168   | Check        |
| PLAT334_ALERT_2_C | Small <C-C> Benzene Dist. C004 -C00G .           | 1.37    | Ang.         |
| PLAT334_ALERT_2_C | Small <C-C> Benzene Dist. C00H -C00O .           | 1.37    | Ang.         |
| PLAT340_ALERT_3_C | Low Bond Precision on C-C Bonds .....            | 0.00797 | Ang.         |
| PLAT360_ALERT_2_C | Short C(sp3)-C(sp3) Bond C011 - C015 .           | 1.42    | Ang.         |
| PLAT360_ALERT_2_C | Short C(sp3)-C(sp3) Bond C017 - C01D .           | 1.39    | Ang.         |
| PLAT360_ALERT_2_C | Short C(sp3)-C(sp3) Bond C01E - C01F .           | 1.41    | Ang.         |
| PLAT360_ALERT_2_C | Short C(sp3)-C(sp3) Bond C01G - C01I .           | 1.39    | Ang.         |
| PLAT360_ALERT_2_C | Short C(sp3)-C(sp3) Bond C01H - C01L .           | 1.36    | Ang.         |
| PLAT410_ALERT_2_C | Short Intra H...H Contact H00K ..H01Q .          | 1.98    | Ang.         |
|                   | x,y,z =                                          | 1_555   | Check        |
| PLAT415_ALERT_2_C | Short Inter D-H..H-X H1C ..H01T .                | 2.00    | Ang.         |
|                   | 1-x,-1/2+y,1/2-z =                               | 2_645   | Check        |
| PLAT906_ALERT_3_C | Large K Value in the Analysis of Variance .....  | 19.374  | Check        |
| PLAT911_ALERT_3_C | Missing FCF Refl Between Thmin & STh/L= 0.600    | 270     | Report       |
| PLAT918_ALERT_3_C | Reflection(s) with I(obs) much Smaller I(calc) . | 18      | Check        |
| PLAT939_ALERT_3_C | Large Value of Not (SHELXL) Weight Optimized S . | 65.50   | Check        |
| PLAT977_ALERT_2_C | Check Negative Difference Density on H .         | -0.32   | eA-3         |
| PLAT977_ALERT_2_C | Check Negative Difference Density on H00E .      | -0.46   | eA-3         |
| PLAT977_ALERT_2_C | Check Negative Difference Density on H00W .      | -0.49   | eA-3         |
| PLAT977_ALERT_2_C | Check Negative Difference Density on H01Q .      | -0.43   | eA-3         |
| PLAT977_ALERT_2_C | Check Negative Difference Density on H01T .      | -0.33   | eA-3         |
| PLAT977_ALERT_2_C | Check Negative Difference Density on H01Z .      | -0.33   | eA-3         |
| PLAT977_ALERT_2_C | Check Negative Difference Density on Hc .        | -0.45   | eA-3         |

---



## ● Alert level G

|                   |                                                  |        |        |
|-------------------|--------------------------------------------------|--------|--------|
| PLAT002_ALERT_2_G | Number of Distance or Angle Restraints on AtSite | 5      | Note   |
| PLAT003_ALERT_2_G | Number of Uiso or Uij Restrained non-H Atoms ... | 6      | Report |
| PLAT007_ALERT_5_G | Number of Unrefined Donor-H Atoms .....          | 5      | Report |
| PLAT045_ALERT_1_G | Calculated and Reported Z Differ by a Factor ... | 0.500  | Check  |
| PLAT072_ALERT_2_G | SHELXL First Parameter in WGHT Unusually Large   | 0.20   | Report |
| PLAT172_ALERT_4_G | The CIF-Embedded .res File Contains DFIX Records | 3      | Report |
| PLAT177_ALERT_4_G | The CIF-Embedded .res File Contains DELU Records | 2      | Report |
| PLAT178_ALERT_4_G | The CIF-Embedded .res File Contains SIMU Records | 1      | Report |
| PLAT186_ALERT_4_G | The CIF-Embedded .res File Contains ISOR Records | 2      | Report |
| PLAT188_ALERT_3_G | A Non-default SIMU Restraint Value has been used | 0.0060 | Report |
| PLAT192_ALERT_3_G | A Non-default DELU Restraint Value for First Par | 0.0040 | Report |
| PLAT192_ALERT_3_G | A Non-default DELU Restraint Value for SecondPar | 0.0080 | Report |
| PLAT192_ALERT_3_G | A Non-default DELU Restraint Value for First Par | 0.0040 | Report |
| PLAT192_ALERT_3_G | A Non-default DELU Restraint Value for SecondPar | 0.0080 | Report |
| PLAT300_ALERT_4_G | Atom Site Occupancy of K016 Constrained at       | 0.5    | Check  |
| PLAT300_ALERT_4_G | Atom Site Occupancy of O3 Constrained at         | 0.5    | Check  |
| PLAT300_ALERT_4_G | Atom Site Occupancy of H3 Constrained at         | 0.5    | Check  |
| PLAT300_ALERT_4_G | Atom Site Occupancy of O2 Constrained at         | 0.5    | Check  |
| PLAT300_ALERT_4_G | Atom Site Occupancy of H2A Constrained at        | 0.5    | Check  |
| PLAT300_ALERT_4_G | Atom Site Occupancy of H2B Constrained at        | 0.5    | Check  |
| PLAT301_ALERT_3_G | Main Residue Disorder .....(Resd 1 )             | 2%     | Note   |
| PLAT302_ALERT_4_G | Anion/Solvent/Minor-Residue Disorder (Resd 3 )   | 100%   | Note   |
| PLAT303_ALERT_2_G | Full Occupancy Atom H01G with # Connections      | 1.50   | Check  |
| PLAT304_ALERT_4_G | Non-Integer Number of Atoms in ..... (Resd 1 )   | 111.50 | Check  |
| PLAT304_ALERT_4_G | Non-Integer Number of Atoms in ..... (Resd 3 )   | 1.50   | Check  |
| PLAT343_ALERT_2_G | Unusual sp? Angle Range in Main Residue for      | C014   | Check  |
| PLAT343_ALERT_2_G | Unusual sp? Angle Range in Main Residue for      | C01M   | Check  |
| PLAT398_ALERT_2_G | Deviating C-O-C Angle From 120 for O00Q .        | 108.5  | Degree |
| PLAT720_ALERT_4_G | Number of Unusual/Non-Standard Labels .....      | 103    | Note   |
| PLAT860_ALERT_3_G | Number of Least-Squares Restraints .....         | 23     | Note   |
| PLAT912_ALERT_4_G | Missing # of FCF Reflections Above STh/L= 0.600  | 412    | Note   |
| PLAT933_ALERT_2_G | Number of HKL-OMIT Records in Embedded .res File | 11     | Note   |
| PLAT941_ALERT_3_G | Average HKL Measurement Multiplicity .....       | 4.5    | Low    |
| PLAT978_ALERT_2_G | Number C-C Bonds with Positive Residual Density. | 0      | Info   |
| PLAT992_ALERT_5_G | Repd & Actual _reflns_number_gt Values Differ by | 2      | Check  |

---

0 **ALERT level A** = Most likely a serious problem - resolve or explain  
4 **ALERT level B** = A potentially serious problem, consider carefully  
39 **ALERT level C** = Check. Ensure it is not caused by an omission or oversight  
35 **ALERT level G** = General information/check it is not something unexpected

2 **ALERT type 1** CIF construction/syntax error, inconsistent or missing data  
37 **ALERT type 2** Indicator that the structure model may be wrong or deficient  
19 **ALERT type 3** Indicator that the structure quality may be low  
18 **ALERT type 4** Improvement, methodology, query or suggestion  
2 **ALERT type 5** Informative message, check

---



It is advisable to attempt to resolve as many as possible of the alerts in all categories. Often the minor alerts point to easily fixed oversights, errors and omissions in your CIF or refinement strategy, so attention to these fine details can be worthwhile. In order to resolve some of the more serious problems it may be necessary to carry out additional measurements or structure refinements. However, the purpose of your study may justify the reported deviations and the more serious of these should normally be commented upon in the discussion or experimental section of a paper or in the "special\_details" fields of the CIF. checkCIF was carefully designed to identify outliers and unusual parameters, but every test has its limitations and alerts that are not important in a particular case may appear. Conversely, the absence of alerts does not guarantee there are no aspects of the results needing attention. It is up to the individual to critically assess their own results and, if necessary, seek expert advice.

### **Publication of your CIF in IUCr journals**

A basic structural check has been run on your CIF. These basic checks will be run on all CIFs submitted for publication in IUCr journals (*Acta Crystallographica*, *Journal of Applied Crystallography*, *Journal of Synchrotron Radiation*); however, if you intend to submit to *Acta Crystallographica Section C* or *E* or *IUCrData*, you should make sure that full publication checks are run on the final version of your CIF prior to submission.

### **Publication of your CIF in other journals**

Please refer to the *Notes for Authors* of the relevant journal for any special instructions relating to CIF submission.



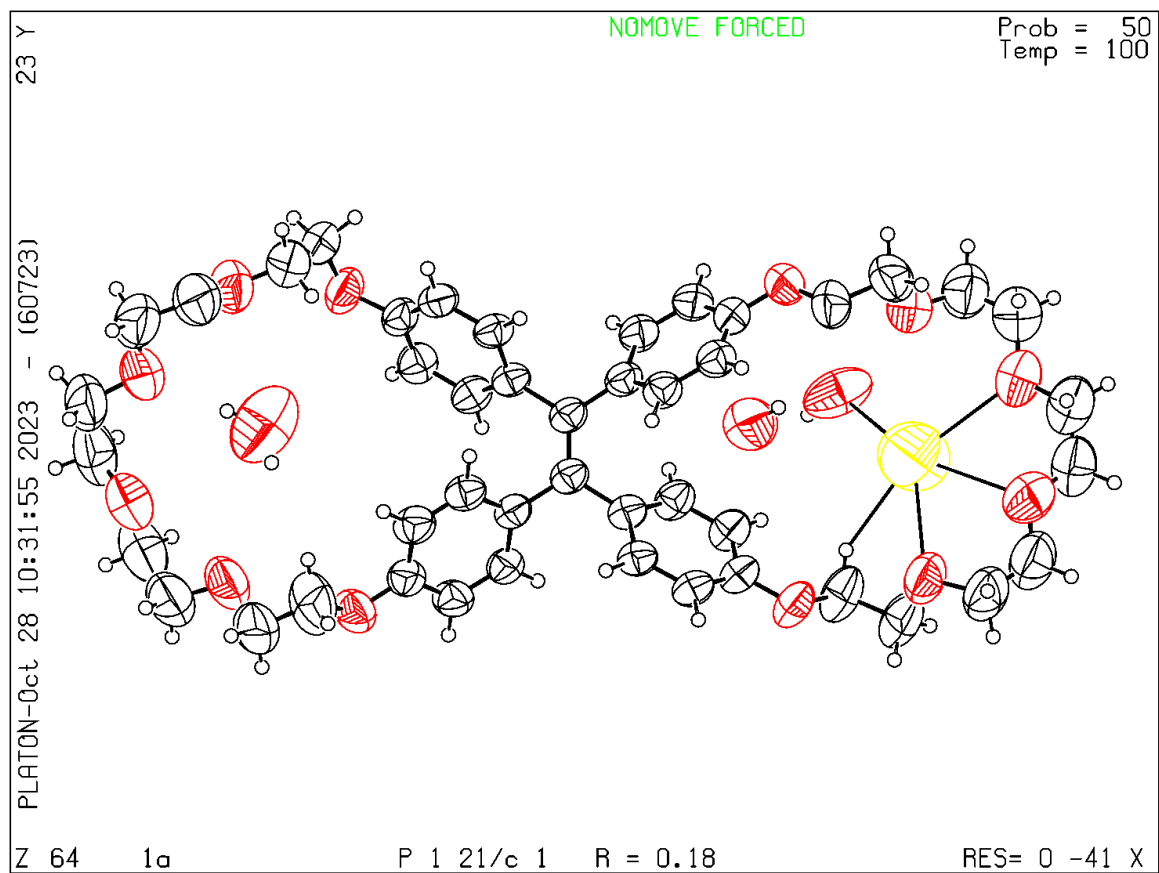

Supplement: Supplementary file 3 [file 76cf1e52f383c9fcea610d41.pdf]
