# Supplementary material for: Unprecedented TPE-Embedded Butterfly Bis-Crown Ether with Controllable Conformation and Supramolecular Chiroptical Property
Source: Research Square preprint supplement (doi:10.21203/rs.3.rs-4143303/v2), 2024-04-11

## checkCIF/PLATON report

Structure factors have been supplied for datablock(s) wky

THIS REPORT IS FOR GUIDANCE ONLY. IF USED AS PART OF A REVIEW PROCEDURE FOR PUBLICATION, IT SHOULD NOT REPLACE THE EXPERTISE OF AN EXPERIENCED CRYSTALLOGRAPHIC REFEREE.

No syntax errors found.      CIF dictionary      Interpreting this report

### Datablock: wky

---

|                        |                         |                    |              |
|------------------------|-------------------------|--------------------|--------------|
| Bond precision:        | C-C = 0.0092 Å          | Wavelength=0.71073 |              |
| Cell:                  | a=9.799 (3)             | b=25.394 (9)       | c=18.655 (7) |
|                        | alpha=90                | beta=91.207 (13)   | gamma=90     |
| Temperature:           | 176 K                   |                    |              |
|                        | Calculated              | Reported           |              |
| Volume                 | 4641 (3)                | 4641 (3)           |              |
| Space group            | P 21/c                  | P 1 21/c 1         |              |
| Hall group             | -P 2ybc                 | -P 2ybc            |              |
| Moiety formula         | C46 H56 O12 [+ solvent] | C46 H56 O12        |              |
| Sum formula            | C46 H56 O12 [+ solvent] | C46 H56 O12        |              |
| Mr                     | 800.91                  | 800.90             |              |
| Dx, g cm <sup>-3</sup> | 1.146                   | 1.146              |              |
| Z                      | 4                       | 4                  |              |
| Mu (mm <sup>-1</sup> ) | 0.082                   | 0.082              |              |
| F000                   | 1712.0                  | 1712.0             |              |
| F000'                  | 1712.93                 |                    |              |
| h, k, lmax             |                         | 12, 31, 23         |              |
| Nref                   |                         | 9361               |              |
| Tmin, Tmax             | 0.984, 0.984            | 0.662, 0.745       |              |
| Tmin'                  | 0.984                   |                    |              |

Correction method= # Reported T Limits: Tmin=0.662 Tmax=0.745  
AbsCorr = ?

Data completeness=      Theta(max)= 26.330

|                                |                   |
|--------------------------------|-------------------|
| R(reflections)= 0.1295 ( 4912) | wR2(reflections)= |
| S = 1.062                      | 0.3101 ( 9361)    |
| Npar= 524                      |                   |

---

The following ALERTS were generated. Each ALERT has the format

**test-name\_ALERT\_alert-type\_alert-level.**

Click on the hyperlinks for more details of the test.

---

### Alert level B

|                   |                                                  |             |
|-------------------|--------------------------------------------------|-------------|
| PLAT031_ALERT_4_B | Refined Extinction Parameter Within Range of ... | 1.800 Sigma |
| PLAT230_ALERT_2_B | Hirshfeld Test Diff for O005 --C01P .            | 7.1 s.u.    |
| PLAT360_ALERT_2_B | Short C(sp3)-C(sp3) Bond C01F - C01M .           | 1.33 Ang.   |
| PLAT410_ALERT_2_B | Short Intra H...H Contact H010 ..H01Q .          | 1.89 Ang.   |
|                   | x,y,z =                                          | 1_555 Check |

---

### Alert level C

CRYSC01\_ALERT\_1\_C The word below has not been recognised as a standard identifier.

dull

CRYSC01\_ALERT\_1\_C The word below has not been recognised as a standard identifier.

whiteish

|                   |                                                  |           |             |
|-------------------|--------------------------------------------------|-----------|-------------|
| PLAT052_ALERT_1_C | Info on Absorption Correction Method             | Not Given | Please Do ! |
| PLAT082_ALERT_2_C | High R1 Value .....                              |           | 0.13 Report |
| PLAT084_ALERT_3_C | High wR2 Value (i.e. > 0.25) .....               |           | 0.31 Report |
| PLAT094_ALERT_2_C | Ratio of Maximum / Minimum Residual Density .... |           | 2.23 Report |
| PLAT220_ALERT_2_C | NonSolvent Resd 1 C Ueq(max)/Ueq(min) Range      |           | 3.3 Ratio   |
| PLAT230_ALERT_2_C | Hirshfeld Test Diff for C01F --C01M .            |           | 5.1 s.u.    |
| PLAT230_ALERT_2_C | Hirshfeld Test Diff for C01I --C01P .            |           | 5.2 s.u.    |
| PLAT234_ALERT_4_C | Large Hirshfeld Difference O00G --C01C .         |           | 0.20 Ang.   |
| PLAT234_ALERT_4_C | Large Hirshfeld Difference O00H --C019 .         |           | 0.17 Ang.   |
| PLAT234_ALERT_4_C | Large Hirshfeld Difference O00H --C01M .         |           | 0.20 Ang.   |
| PLAT234_ALERT_4_C | Large Hirshfeld Difference O00I --C01I .         |           | 0.19 Ang.   |
| PLAT234_ALERT_4_C | Large Hirshfeld Difference O00O --C01O .         |           | 0.18 Ang.   |
| PLAT234_ALERT_4_C | Large Hirshfeld Difference O00R --C01J .         |           | 0.16 Ang.   |
| PLAT234_ALERT_4_C | Large Hirshfeld Difference C00Z --C012 .         |           | 0.17 Ang.   |
| PLAT234_ALERT_4_C | Large Hirshfeld Difference C01E --C01H .         |           | 0.18 Ang.   |
| PLAT241_ALERT_2_C | High 'MainMol' Ueq as Compared to Neighbors of   | C01C      | Check       |
| PLAT241_ALERT_2_C | High 'MainMol' Ueq as Compared to Neighbors of   | C01E      | Check       |
| PLAT241_ALERT_2_C | High 'MainMol' Ueq as Compared to Neighbors of   | C01F      | Check       |
| PLAT241_ALERT_2_C | High 'MainMol' Ueq as Compared to Neighbors of   | C01I      | Check       |
| PLAT241_ALERT_2_C | High 'MainMol' Ueq as Compared to Neighbors of   | C01K      | Check       |
| PLAT241_ALERT_2_C | High 'MainMol' Ueq as Compared to Neighbors of   | C01O      | Check       |
| PLAT242_ALERT_2_C | Low 'MainMol' Ueq as Compared to Neighbors of    | O004      | Check       |
| PLAT242_ALERT_2_C | Low 'MainMol' Ueq as Compared to Neighbors of    | O00G      | Check       |
| PLAT242_ALERT_2_C | Low 'MainMol' Ueq as Compared to Neighbors of    | O00H      | Check       |
| PLAT242_ALERT_2_C | Low 'MainMol' Ueq as Compared to Neighbors of    | O00I      | Check       |
| PLAT242_ALERT_2_C | Low 'MainMol' Ueq as Compared to Neighbors of    | O00O      | Check       |
| PLAT260_ALERT_2_C | Large Average Ueq of Residue Including O001      | 0.106     | Check       |
| PLAT340_ALERT_3_C | Low Bond Precision on C-C Bonds .....            | 0.00918   | Ang.        |
| PLAT360_ALERT_2_C | Short C(sp3)-C(sp3) Bond C019 - C01D .           |           | 1.42 Ang.   |
| PLAT360_ALERT_2_C | Short C(sp3)-C(sp3) Bond C01B - C01L .           |           | 1.43 Ang.   |
| PLAT360_ALERT_2_C | Short C(sp3)-C(sp3) Bond C01I - C01P .           |           | 1.37 Ang.   |
| PLAT906_ALERT_3_C | Large K Value in the Analysis of Variance .....  | 9.034     | Check       |
| PLAT906_ALERT_3_C | Large K Value in the Analysis of Variance .....  | 3.289     | Check       |
| PLAT906_ALERT_3_C | Large K Value in the Analysis of Variance .....  | 7.151     | Check       |
| PLAT906_ALERT_3_C | Large K Value in the Analysis of Variance .....  | 2.308     | Check       |
| PLAT906_ALERT_3_C | Large K Value in the Analysis of Variance .....  | 4.601     | Check       |

PLAT906\_ALERT\_3\_C Large K Value in the Analysis of Variance ..... 2.597 Check  
 PLAT911\_ALERT\_3\_C Missing FCF Refl Between Thmin & STh/L= 0.600 3 Report  
 9 19 0, -4 0 14, -1 13 20,

---

● **Alert level G**

PLAT083\_ALERT\_2\_G SHELXL Second Parameter in WGHT Unusually Large 8.08 Why ?  
 PLAT605\_ALERT\_4\_G Largest Solvent Accessible VOID in the Structure 201 A\*\*3  
 PLAT720\_ALERT\_4\_G Number of Unusual/Non-Standard Labels ..... 108 Note

|      |      |      |      |      |      |      |      |
|------|------|------|------|------|------|------|------|
| O001 | O002 | O003 | O004 | O005 | O006 | C007 | C008 |
| C009 | C00A | H00A | C00B | H00B | C00C | C00D | C00E |
| C00F | O00G | O00H | O00I | C00J | C00K | H00K | O00L |
| C00M | H00M | C00N | H00N | O00O | C00P | H00P | C00Q |
| H00Q | O00R | C00S | H00S | C00T | C00U | H00U | C00V |
| H00V | C00W | H00W | C00X | H00X | C00Y | H00Y | C00Z |
| H00Z | C010 | H010 | C011 | H011 | C012 | C014 | H01A |
| H01B | C015 | H01C | H01D | C017 | H01E | H01F | C018 |
| H01G | H01H | C019 | H01I | H01J | C01B | H01K | H01L |
| C01C | H01M | H01N | C01D | H01O | H01P | C01E | H01Q |
| H01R | C01F | H01S | H01T | C01G | H01U | H01V | C01H |
| H01W | H01X | C01I | H01Y | C01J | H01Z | Ha   | C01K |
| H01  | Hb   | C01L | Hc   | C01M | Hd   | C01N | He   |
| C01O | Hf   | C01P | Hg   |      |      |      |      |

PLAT868\_ALERT\_4\_G ALERTS Due to the Use of \_smtbx\_masks Suppressed ! Info  
 PLAT910\_ALERT\_3\_G Missing # of FCF Reflection(s) Below Theta (Min). 2 Note  
 0 2 0, 0 1 1,  
 PLAT912\_ALERT\_4\_G Missing # of FCF Reflections Above STh/L= 0.600 72 Note  
 PLAT978\_ALERT\_2\_G Number C-C Bonds with Positive Residual Density. 0 Info

- 
- 0 **ALERT level A** = Most likely a serious problem - resolve or explain  
 4 **ALERT level B** = A potentially serious problem, consider carefully  
 40 **ALERT level C** = Check. Ensure it is not caused by an omission or oversight  
 7 **ALERT level G** = General information/check it is not something unexpected
- 3 ALERT type 1 CIF construction/syntax error, inconsistent or missing data  
 25 ALERT type 2 Indicator that the structure model may be wrong or deficient  
 10 ALERT type 3 Indicator that the structure quality may be low  
 13 ALERT type 4 Improvement, methodology, query or suggestion  
 0 ALERT type 5 Informative message, check
-

It is advisable to attempt to resolve as many as possible of the alerts in all categories. Often the minor alerts point to easily fixed oversights, errors and omissions in your CIF or refinement strategy, so attention to these fine details can be worthwhile. In order to resolve some of the more serious problems it may be necessary to carry out additional measurements or structure refinements. However, the purpose of your study may justify the reported deviations and the more serious of these should normally be commented upon in the discussion or experimental section of a paper or in the "special\_details" fields of the CIF. checkCIF was carefully designed to identify outliers and unusual parameters, but every test has its limitations and alerts that are not important in a particular case may appear. Conversely, the absence of alerts does not guarantee there are no aspects of the results needing attention. It is up to the individual to critically assess their own results and, if necessary, seek expert advice.

### **Publication of your CIF in IUCr journals**

A basic structural check has been run on your CIF. These basic checks will be run on all CIFs submitted for publication in IUCr journals (*Acta Crystallographica*, *Journal of Applied Crystallography*, *Journal of Synchrotron Radiation*); however, if you intend to submit to *Acta Crystallographica Section C* or *E* or *IUCrData*, you should make sure that full publication checks are run on the final version of your CIF prior to submission.

### **Publication of your CIF in other journals**

Please refer to the *Notes for Authors* of the relevant journal for any special instructions relating to CIF submission.

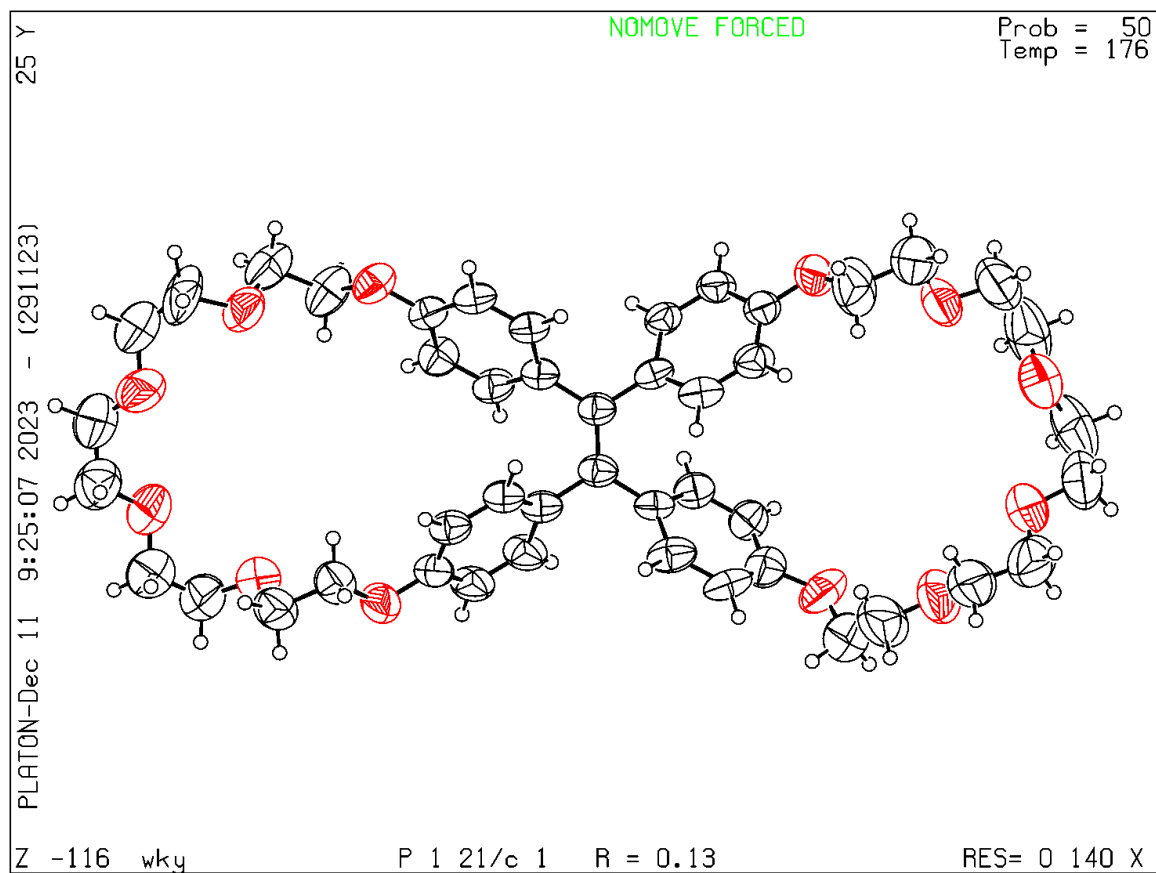

Supplement: Supplementary file 2 [file 663c7ca7289cbee292bd3e30.pdf]
