# Supplementary material for: Unprecedented TPE-Embedded Butterfly Bis-Crown Ether with Controllable Conformation and Supramolecular Chiroptical Property
Source: Research Square preprint supplement (doi:10.21203/rs.3.rs-4143303/v2), 2024-04-11

---

The following ALERTS were generated. Each ALERT has the format

**test-name\_ALERT\_alert-type\_alert-level.**

Click on the hyperlinks for more details of the test.

---

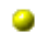

### Alert level C

PLAT052\_ALERT\_1\_C Info on Absorption Correction Method Not Given Please Do !  
PLAT410\_ALERT\_2\_C Short Intra H...H Contact H00P ..H01K . 1.93 Ang.  
x,y,z = 1\_555 Check  
PLAT410\_ALERT\_2\_C Short Intra H...H Contact H00A ..H00Z . 1.99 Ang.  
x,y,z = 1\_555 Check  
PLAT906\_ALERT\_3\_C Large K Value in the Analysis of Variance ..... 7.341 Check  
PLAT911\_ALERT\_3\_C Missing FCF Refl Between Thmin & STh/L= 0.600 2 Report  
2 0 2, -9 6 5,

---

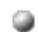

### Alert level G

PLAT720\_ALERT\_4\_G Number of Unusual/Non-Standard Labels ..... 86 Note  
O001 O002 O003 O004 O005 O006 O007 O008  
C009 C00A C00B H00B C00C H00C C00D C00E  
C00F C00G C00H H00H C00I H00I C00J H00J  
C00K C00L C00M C00N H00N C00O H00O C00P  
H00P C00Q H00Q C00R H00R C00S C00T H00T  
C00U H00U C00V H00V C00W H00A H00D C00X  
H00X C00Y H00Y C00Z H00Z C010 H01A H01B  
C011 H01C H01D C012 H01E H01F C013 H01G  
H01H C014 H01I H01J C015 H01K H01L C016  
H01M H01N C017 H01O H01P C018 H01Q H01R  
C019 H01S H01T C01A H01U H01V  
PLAT910\_ALERT\_3\_G Missing # of FCF Reflection(s) Below Theta(Min). 1 Note  
0 1 1,  
PLAT912\_ALERT\_4\_G Missing # of FCF Reflections Above STh/L= 0.600 3 Note  
PLAT978\_ALERT\_2\_G Number C-C Bonds with Positive Residual Density. 7 Info

---

0 **ALERT level A** = Most likely a serious problem - resolve or explain  
0 **ALERT level B** = A potentially serious problem, consider carefully  
5 **ALERT level C** = Check. Ensure it is not caused by an omission or oversight  
4 **ALERT level G** = General information/check it is not something unexpected

1 ALERT type 1 CIF construction/syntax error, inconsistent or missing data  
3 ALERT type 2 Indicator that the structure model may be wrong or deficient  
3 ALERT type 3 Indicator that the structure quality may be low  
2 ALERT type 4 Improvement, methodology, query or suggestion  
0 ALERT type 5 Informative message, check

---

---

It is advisable to attempt to resolve as many as possible of the alerts in all categories. Often the minor alerts point to easily fixed oversights, errors and omissions in your CIF or refinement strategy, so attention to these fine details can be worthwhile. In order to resolve some of the more serious problems it may be necessary to carry out additional measurements or structure refinements. However, the purpose of your study may justify the reported deviations and the more serious of these should normally be commented upon in the discussion or experimental section of a paper or in the "special\_details" fields of the CIF. checkCIF was carefully designed to identify outliers and unusual parameters, but every test has its limitations and alerts that are not important in a particular case may appear. Conversely, the absence of alerts does not guarantee there are no aspects of the results needing attention. It is up to the individual to critically assess their own results and, if necessary, seek expert advice.

### **Publication of your CIF in IUCr journals**

A basic structural check has been run on your CIF. These basic checks will be run on all CIFs submitted for publication in IUCr journals (*Acta Crystallographica*, *Journal of Applied Crystallography*, *Journal of Synchrotron Radiation*); however, if you intend to submit to *Acta Crystallographica Section C* or *E* or *IUCrData*, you should make sure that full publication checks are run on the final version of your CIF prior to submission.

### **Publication of your CIF in other journals**

Please refer to the *Notes for Authors* of the relevant journal for any special instructions relating to CIF submission.

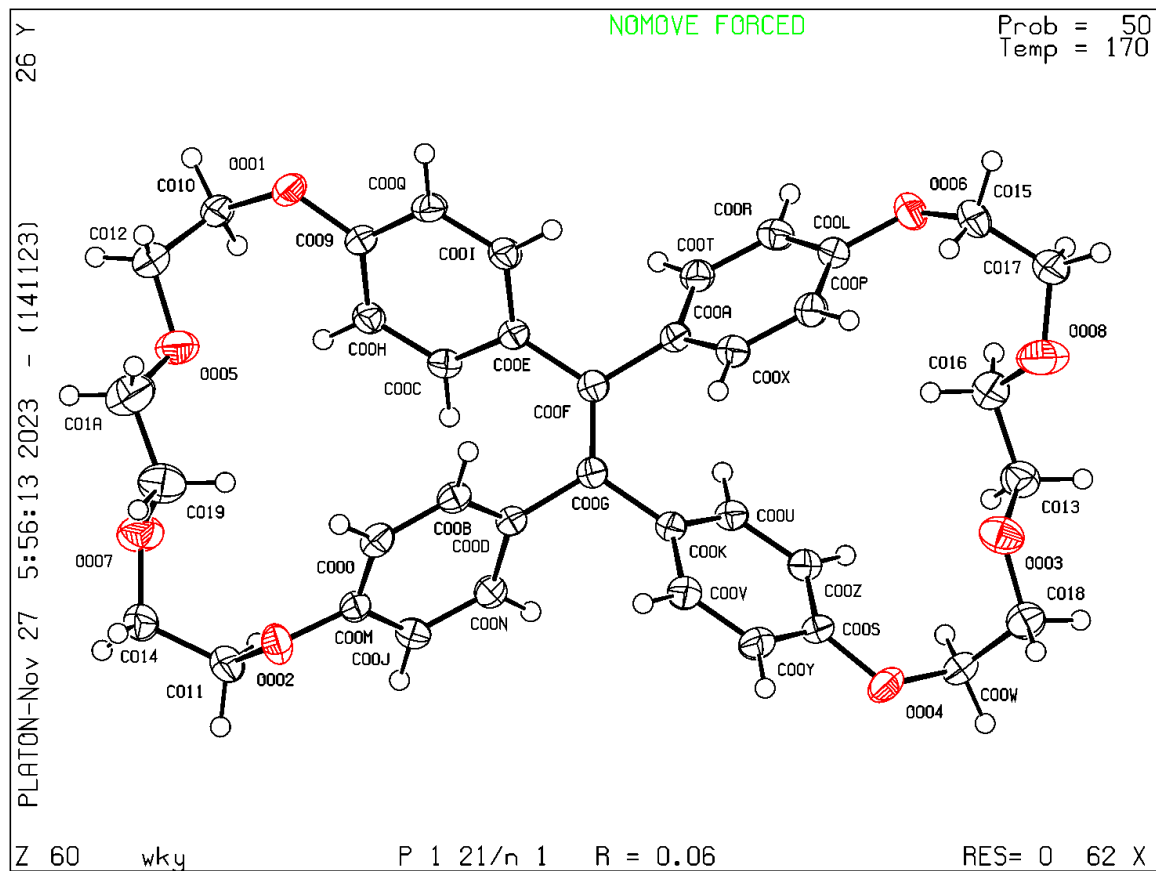

Supplement: Supplementary file 1 [file 6552aa8cbc21b4319387297a.pdf]
