# Supplementary material for: Unprecedented TPE-Embedded Butterfly Bis-Crown Ether with Controllable Conformation and Supramolecular Chiroptical Property
Source: Research Square preprint supplement (doi:10.21203/rs.3.rs-4143303/v2), 2024-04-11

## checkCIF/PLATON report

Structure factors have been supplied for datablock(s) cu\_0905\_1\_0m

THIS REPORT IS FOR GUIDANCE ONLY. IF USED AS PART OF A REVIEW PROCEDURE FOR PUBLICATION, IT SHOULD NOT REPLACE THE EXPERTISE OF AN EXPERIENCED CRYSTALLOGRAPHIC REFEREE.

No syntax errors found.      CIF dictionary      Interpreting this report

### Datablock: cu\_0905\_1\_0m

---

|                        |                |                                  |
|------------------------|----------------|----------------------------------|
| Bond precision:        | C-C = 0.0079 Å | Wavelength=1.54178               |
| Cell:                  | a=18.0897 (9)  | b=9.4109 (6)      c=21.7652 (11) |
|                        | alpha=90       | beta=100.338 (4)      gamma=90   |
| Temperature:           | 150 K          |                                  |
|                        | Calculated     | Reported                         |
| Volume                 | 3645.2 (4)     | 3645.2 (4)                       |
| Space group            | P 21/n         | P 1 21/n 1                       |
| Hall group             | -P 2yn         | -P 2yn                           |
| Moiety formula         | C42 H48 O10    | C42 H48 O10                      |
| Sum formula            | C42 H48 O10    | C42 H48 O10                      |
| Mr                     | 712.80         | 712.80                           |
| Dx, g cm <sup>-3</sup> | 1.299          | 1.299                            |
| Z                      | 4              | 4                                |
| Mu (mm <sup>-1</sup> ) | 0.751          | 0.751                            |
| F000                   | 1520.0         | 1520.0                           |
| F000'                  | 1524.84        |                                  |
| h, k, lmax             | 22, 11, 26     | 22, 11, 26                       |
| Nref                   | 7188           | 6995                             |
| Tmin, Tmax             | 0.893, 0.914   | 0.010, 0.087                     |
| Tmin'                  | 0.893          |                                  |

Correction method= # Reported T Limits: Tmin=0.010 Tmax=0.087  
AbsCorr = NONE

Data completeness= 0.973      Theta(max)= 72.101

|                                |                   |
|--------------------------------|-------------------|
| R(reflections)= 0.1174 ( 5137) | wR2(reflections)= |
| S = 1.075                      | 0.2696 ( 6995)    |
| Npar= 489                      |                   |

---

The following ALERTS were generated. Each ALERT has the format

**test-name\_ALERT\_alert-type\_alert-level.**

Click on the hyperlinks for more details of the test.

---

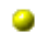

### Alert level C

|                   |                                                  |         |        |
|-------------------|--------------------------------------------------|---------|--------|
| PLAT082_ALERT_2_C | High R1 Value .....                              | 0.12    | Report |
| PLAT084_ALERT_3_C | High wR2 Value (i.e. > 0.25) .....               | 0.27    | Report |
| PLAT241_ALERT_2_C | High 'MainMol' Ueq as Compared to Neighbors of   | 0006    | Check  |
| PLAT241_ALERT_2_C | High 'MainMol' Ueq as Compared to Neighbors of   | 000M    | Check  |
| PLAT241_ALERT_2_C | High 'MainMol' Ueq as Compared to Neighbors of   | 000F    | Check  |
| PLAT242_ALERT_2_C | Low 'MainMol' Ueq as Compared to Neighbors of    | C020    | Check  |
| PLAT340_ALERT_3_C | Low Bond Precision on C-C Bonds .....            | 0.00791 | Ang.   |
| PLAT410_ALERT_2_C | Short Intra H...H Contact H02O ..H02P .          | 1.97    | Ang.   |
|                   | x,y,z =                                          | 1_555   | Check  |
| PLAT790_ALERT_4_C | Centre of Gravity not Within Unit Cell: Resd. #  | 1       | Note   |
|                   | C42 H48 O10                                      |         |        |
| PLAT906_ALERT_3_C | Large K Value in the Analysis of Variance .....  | 39.856  | Check  |
| PLAT906_ALERT_3_C | Large K Value in the Analysis of Variance .....  | 5.278   | Check  |
| PLAT906_ALERT_3_C | Large K Value in the Analysis of Variance .....  | 3.247   | Check  |
| PLAT911_ALERT_3_C | Missing FCF Refl Between Thmin & STh/L= 0.600    | 112     | Report |
| PLAT913_ALERT_3_C | Missing # of Very Strong Reflections in FCF .... | 4       | Note   |

---

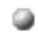

### Alert level G

|                   |                                                  |       |             |
|-------------------|--------------------------------------------------|-------|-------------|
| PLAT002_ALERT_2_G | Number of Distance or Angle Restraints on AtSite | 7     | Note        |
| PLAT003_ALERT_2_G | Number of Uiso or Uij Restrained non-H Atoms ... | 8     | Report      |
| PLAT083_ALERT_2_G | SHELXL Second Parameter in WGHT Unusually Large  | 10.76 | Why ?       |
| PLAT176_ALERT_4_G | The CIF-Embedded .res File Contains SADI Records | 3     | Report      |
| PLAT178_ALERT_4_G | The CIF-Embedded .res File Contains SIMU Records | 2     | Report      |
| PLAT230_ALERT_2_G | Hirshfeld Test Diff for O00F --C0 .              | 7.2   | s.u.        |
| PLAT301_ALERT_3_G | Main Residue Disorder .....(Resd 1 )             | 4%    | Note        |
| PLAT410_ALERT_2_G | Short Intra H...H Contact H1B ..H02W .           | 2.11  | Ang.        |
|                   | x,y,z =                                          | 1_555 | Check       |
| PLAT410_ALERT_2_G | Short Intra H...H Contact H3A ..H02S .           | 2.10  | Ang.        |
|                   | x,y,z =                                          | 1_555 | Check       |
| PLAT410_ALERT_2_G | Short Intra H...H Contact H01M ..H2B .           | 1.87  | Ang.        |
|                   | x,y,z =                                          | 1_555 | Check       |
| PLAT410_ALERT_2_G | Short Intra H...H Contact H02M ..H01K .          | 2.11  | Ang.        |
|                   | x,y,z =                                          | 1_555 | Check       |
| PLAT410_ALERT_2_G | Short Intra H...H Contact H02W ..H0A .           | 2.07  | Ang.        |
|                   | x,y,z =                                          | 1_555 | Check       |
| PLAT720_ALERT_4_G | Number of Unusual/Non-Standard Labels .....      | 100   | Note        |
| PLAT860_ALERT_3_G | Number of Least-Squares Restraints .....         | 63    | Note        |
| PLAT883_ALERT_1_G | No Info/Value for _atom_sites_solution_primary . |       | Please Do ! |
| PLAT912_ALERT_4_G | Missing # of FCF Reflections Above STh/L= 0.600  | 81    | Note        |
| PLAT933_ALERT_2_G | Number of HKL-OMIT Records in Embedded .res File | 3     | Note        |
| PLAT941_ALERT_3_G | Average HKL Measurement Multiplicity .....       | 3.3   | Low         |
| PLAT978_ALERT_2_G | Number C-C Bonds with Positive Residual Density. | 0     | Info        |
| PLAT992_ALERT_5_G | Repd & Actual _reflns_number_gt Values Differ by | 2     | Check       |

---

0 **ALERT level A** = Most likely a serious problem - resolve or explain

0 **ALERT level B** = A potentially serious problem, consider carefully

14 **ALERT level C** = Check. Ensure it is not caused by an omission or oversight

20 **ALERT level G** = General information/check it is not something unexpected

1 ALERT type 1 CIF construction/syntax error, inconsistent or missing data  
17 ALERT type 2 Indicator that the structure model may be wrong or deficient  
10 ALERT type 3 Indicator that the structure quality may be low  
5 ALERT type 4 Improvement, methodology, query or suggestion  
1 ALERT type 5 Informative message, check

---

It is advisable to attempt to resolve as many as possible of the alerts in all categories. Often the minor alerts point to easily fixed oversights, errors and omissions in your CIF or refinement strategy, so attention to these fine details can be worthwhile. In order to resolve some of the more serious problems it may be necessary to carry out additional measurements or structure refinements. However, the purpose of your study may justify the reported deviations and the more serious of these should normally be commented upon in the discussion or experimental section of a paper or in the "special\_details" fields of the CIF. checkCIF was carefully designed to identify outliers and unusual parameters, but every test has its limitations and alerts that are not important in a particular case may appear. Conversely, the absence of alerts does not guarantee there are no aspects of the results needing attention. It is up to the individual to critically assess their own results and, if necessary, seek expert advice.

### **Publication of your CIF in IUCr journals**

A basic structural check has been run on your CIF. These basic checks will be run on all CIFs submitted for publication in IUCr journals (*Acta Crystallographica*, *Journal of Applied Crystallography*, *Journal of Synchrotron Radiation*); however, if you intend to submit to *Acta Crystallographica Section C* or *E* or *IUCrData*, you should make sure that full publication checks are run on the final version of your CIF prior to submission.

### **Publication of your CIF in other journals**

Please refer to the *Notes for Authors* of the relevant journal for any special instructions relating to CIF submission.

---

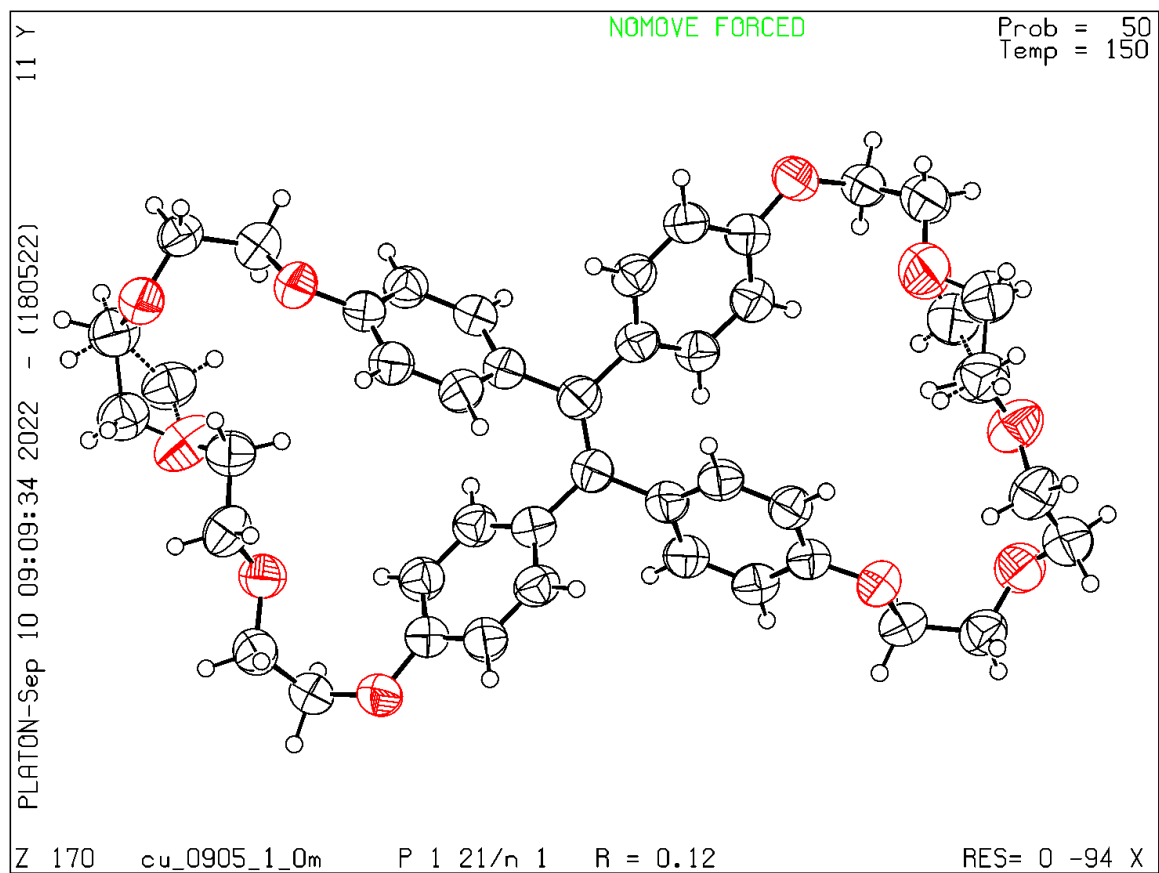

Supplement: Supplementary file 5 [file a5c516beadd9a17d35cbdd84.pdf]
