# Supplementary material for: Unprecedented TPE-Embedded Butterfly Bis-Crown Ether with Controllable Conformation and Supramolecular Chiroptical Property
Source: Research Square preprint supplement (doi:10.21203/rs.3.rs-4143303/v2), 2024-04-11

# checkCIF/PLATON report

Structure factors have been supplied for datablock(s) 1a

THIS REPORT IS FOR GUIDANCE ONLY. IF USED AS PART OF A REVIEW PROCEDURE FOR PUBLICATION, IT SHOULD NOT REPLACE THE EXPERTISE OF AN EXPERIENCED CRYSTALLOGRAPHIC REFEREE.

No syntax errors found.      CIF dictionary      Interpreting this report

## Datablock: 1a

---

|                        |                        |                                |
|------------------------|------------------------|--------------------------------|
| Bond precision:        | C-C = 0.0055 A         | Wavelength=1.54178             |
| Cell:                  | a=9.8336(3)            | b=26.7597(8)      c=18.6548(5) |
|                        | alpha=90               | beta=93.756(1)      gamma=90   |
| Temperature:           | 100 K                  |                                |
|                        | Calculated             | Reported                       |
| Volume                 | 4898.4(2)              | 4898.4(2)                      |
| Space group            | P 21/c                 | P 1 21/c 1                     |
| Hall group             | -P 2ybc                | -P 2ybc                        |
| Moiety formula         | C50 H64 O14, 0.6(H2 O) | C50 H64 O14, 0.6(H2 O)         |
| Sum formula            | C50 H65.20 O14.60      | C50 H65.20 O14.60              |
| Mr                     | 899.82                 | 899.82                         |
| Dx, g cm <sup>-3</sup> | 1.220                  | 1.220                          |
| Z                      | 4                      | 4                              |
| Mu (mm <sup>-1</sup> ) | 0.733                  | 0.733                          |
| F000                   | 1928.0                 | 1928.0                         |
| F000'                  | 1934.29                |                                |
| h, k, lmax             | 11, 31, 22             | 11, 31, 22                     |
| Nref                   | 8695                   | 8636                           |
| Tmin, Tmax             | 0.876, 0.896           | 0.408, 0.753                   |
| Tmin'                  | 0.876                  |                                |

Correction method= # Reported T Limits: Tmin=0.408 Tmax=0.753  
AbsCorr = MULTI-SCAN

Data completeness= 0.993      Theta(max)= 66.802

|                               |                   |
|-------------------------------|-------------------|
| R(reflections)= 0.0981( 5657) | wR2(reflections)= |
| S = 1.325                     | 0.3492( 8636)     |
| Npar= 745                     |                   |

---

The following ALERTS were generated. Each ALERT has the format

**test-name\_ALERT\_alert-type\_alert-level.**

Click on the hyperlinks for more details of the test.

---

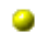

### Alert level C

|                   |                                                     |         |        |
|-------------------|-----------------------------------------------------|---------|--------|
| PLAT084_ALERT_3_C | High wR2 Value (i.e. > 0.25) .....                  | 0.35    | Report |
| PLAT220_ALERT_2_C | NonSolvent Resd 1 C Ueq(max)/Ueq(min) Range         | 4.6     | Ratio  |
| PLAT222_ALERT_3_C | NonSolvent Resd 1 H Uiso(max)/Uiso(min) Range       | 4.4     | Ratio  |
| PLAT230_ALERT_2_C | Hirshfeld Test Diff for C014 --C016 .               | 5.8     | s.u.   |
| PLAT230_ALERT_2_C | Hirshfeld Test Diff for C019 --C01D .               | 5.1     | s.u.   |
| PLAT234_ALERT_4_C | Large Hirshfeld Difference O00W --C01M .            | 0.18    | Ang.   |
| PLAT234_ALERT_4_C | Large Hirshfeld Difference O00Y --C01B .            | 0.20    | Ang.   |
| PLAT234_ALERT_4_C | Large Hirshfeld Difference O00Y --C01O .            | 0.16    | Ang.   |
| PLAT234_ALERT_4_C | Large Hirshfeld Difference C01B --C01E .            | 0.22    | Ang.   |
| PLAT241_ALERT_2_C | High 'MainMol' Ueq as Compared to Neighbors of C019 |         | Check  |
| PLAT241_ALERT_2_C | High 'MainMol' Ueq as Compared to Neighbors of C01B |         | Check  |
| PLAT241_ALERT_2_C | High 'MainMol' Ueq as Compared to Neighbors of C01K |         | Check  |
| PLAT241_ALERT_2_C | High 'MainMol' Ueq as Compared to Neighbors of C01M |         | Check  |
| PLAT242_ALERT_2_C | Low 'MainMol' Ueq as Compared to Neighbors of O00R  |         | Check  |
| PLAT242_ALERT_2_C | Low 'MainMol' Ueq as Compared to Neighbors of O00Y  |         | Check  |
| PLAT242_ALERT_2_C | Low 'MainMol' Ueq as Compared to Neighbors of C012  |         | Check  |
| PLAT260_ALERT_2_C | Large Average Ueq of Residue Including O1           | 0.143   | Check  |
| PLAT260_ALERT_2_C | Large Average Ueq of Residue Including O017         | 0.133   | Check  |
| PLAT340_ALERT_3_C | Low Bond Precision on C-C Bonds .....               | 0.00553 | Ang.   |
| PLAT360_ALERT_2_C | Short C(sp3)-C(sp3) Bond C01B - C01E .              | 1.36    | Ang.   |
| PLAT360_ALERT_2_C | Short C(sp3)-C(sp3) Bond C01N - C01O .              | 1.40    | Ang.   |
| PLAT906_ALERT_3_C | Large K Value in the Analysis of Variance .....     | 7.331   | Check  |
| PLAT911_ALERT_3_C | Missing FCF Refl Between Thmin & STh/L= 0.596       | 59      | Report |

---

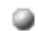

### Alert level G

|                   |                                                  |        |        |
|-------------------|--------------------------------------------------|--------|--------|
| PLAT002_ALERT_2_G | Number of Distance or Angle Restraints on AtSite | 39     | Note   |
| PLAT003_ALERT_2_G | Number of Uiso or Uij Restrained non-H Atoms ... | 47     | Report |
| PLAT007_ALERT_5_G | Number of Unrefined Donor-H Atoms .....          | 2      | Report |
| PLAT072_ALERT_2_G | SHELXL First Parameter in WGHT Unusually Large   | 0.20   | Report |
| PLAT173_ALERT_4_G | The CIF-Embedded .res File Contains DANG Records | 5      | Report |
| PLAT176_ALERT_4_G | The CIF-Embedded .res File Contains SADI Records | 5      | Report |
| PLAT178_ALERT_4_G | The CIF-Embedded .res File Contains SIMU Records | 8      | Report |
| PLAT186_ALERT_4_G | The CIF-Embedded .res File Contains ISOR Records | 1      | Report |
| PLAT188_ALERT_3_G | A Non-default SIMU Restraint Value has been used | 0.0300 | Report |
| PLAT188_ALERT_3_G | A Non-default SIMU Restraint Value has been used | 0.0100 | Report |
| PLAT188_ALERT_3_G | A Non-default SIMU Restraint Value has been used | 0.0100 | Report |
| PLAT188_ALERT_3_G | A Non-default SIMU Restraint Value has been used | 0.0100 | Report |
| PLAT188_ALERT_3_G | A Non-default SIMU Restraint Value has been used | 0.0100 | Report |
| PLAT230_ALERT_2_G | Hirshfeld Test Diff for O4 --C01M .              | 7.6    | s.u.   |
| PLAT230_ALERT_2_G | Hirshfeld Test Diff for C10 --C012 .             | 5.7    | s.u.   |
| PLAT300_ALERT_4_G | Atom Site Occupancy of O017 Constrained at       | 0.6    | Check  |
| PLAT300_ALERT_4_G | Atom Site Occupancy of H Constrained at          | 0.6    | Check  |
| PLAT300_ALERT_4_G | Atom Site Occupancy of H7 Constrained at         | 0.6    | Check  |
| PLAT301_ALERT_3_G | Main Residue Disorder .....(Resd 1 )             | 27%    | Note   |
| PLAT302_ALERT_4_G | Anion/Solvent/Minor-Residue Disorder (Resd 2 )   | 100%   | Note   |
| PLAT304_ALERT_4_G | Non-Integer Number of Atoms in ..... (Resd 2 )   | 1.80   | Check  |
| PLAT367_ALERT_2_G | Long? C(sp?)-C(sp?) Bond C01K - C01M .           | 1.52   | Ang.   |
| PLAT398_ALERT_2_G | Deviating C-O-C Angle From 120 for O2 .          | 109.9  | Degree |
| PLAT398_ALERT_2_G | Deviating C-O-C Angle From 120 for O3 .          | 148.1  | Degree |

|                   |                                                  |       |                         |   |              |
|-------------------|--------------------------------------------------|-------|-------------------------|---|--------------|
| PLAT398_ALERT_2_G | Deviating                                        | C-O-C | Angle From 120 for O3A  | . | 138.1 Degree |
| PLAT398_ALERT_2_G | Deviating                                        | C-O-C | Angle From 120 for O00Y | . | 108.9 Degree |
| PLAT398_ALERT_2_G | Deviating                                        | C-O-C | Angle From 120 for O12A | . | 84.8 Degree  |
| PLAT398_ALERT_2_G | Deviating                                        | C-O-C | Angle From 120 for O00{ | . | 109.7 Degree |
| PLAT398_ALERT_2_G | Deviating                                        | C-O-C | Angle From 120 for O4   | . | 92.7 Degree  |
| PLAT410_ALERT_2_G | Short Intra H...H Contact                        | H00G  | ..H01J                  | . | 1.74 Ang.    |
|                   |                                                  |       | x,y,z =                 |   | 1_555 Check  |
| PLAT410_ALERT_2_G | Short Intra H...H Contact                        | H00S  | ..H01N                  | . | 2.06 Ang.    |
|                   |                                                  |       | x,y,z =                 |   | 1_555 Check  |
| PLAT410_ALERT_2_G | Short Intra H...H Contact                        | H00S  | ..H01O                  | . | 2.05 Ang.    |
|                   |                                                  |       | x,y,z =                 |   | 1_555 Check  |
| PLAT415_ALERT_2_G | Short Inter D-H..H-X                             | H     | ..H01Y                  | . | 2.07 Ang.    |
|                   |                                                  |       | x,1/2-y,-1/2+z =        |   | 4_565 Check  |
| PLAT432_ALERT_2_G | Short Inter X...Y Contact                        | O017  | ..C8                    | . | 2.98 Ang.    |
|                   |                                                  |       | 1-x,1-y,1-z =           |   | 3_666 Check  |
| PLAT720_ALERT_4_G | Number of Unusual/Non-Standard Labels            | ..... |                         |   | 121 Note     |
| PLAT811_ALERT_5_G | No ADDSYM Analysis: Too Many Excluded Atoms      | ....  |                         |   | ! Info       |
| PLAT860_ALERT_3_G | Number of Least-Squares Restraints               | ..... |                         |   | 614 Note     |
| PLAT913_ALERT_3_G | Missing # of Very Strong Reflections in FCF      | ....  |                         |   | 1 Note       |
| PLAT933_ALERT_2_G | Number of HKL-OMIT Records in Embedded .res File |       |                         |   | 5 Note       |
| PLAT941_ALERT_3_G | Average HKL Measurement Multiplicity             | ..... |                         |   | 4.8 Low      |
| PLAT978_ALERT_2_G | Number C-C Bonds with Positive Residual Density. |       |                         |   | 1 Info       |
| PLAT992_ALERT_5_G | Repd & Actual _reflns_number_gt Values Differ by |       |                         |   | 6 Check      |

---

0 **ALERT level A** = Most likely a serious problem - resolve or explain  
 0 **ALERT level B** = A potentially serious problem, consider carefully  
 23 **ALERT level C** = Check. Ensure it is not caused by an omission or oversight  
 42 **ALERT level G** = General information/check it is not something unexpected

0 ALERT type 1 CIF construction/syntax error, inconsistent or missing data  
 34 ALERT type 2 Indicator that the structure model may be wrong or deficient  
 14 ALERT type 3 Indicator that the structure quality may be low  
 14 ALERT type 4 Improvement, methodology, query or suggestion  
 3 ALERT type 5 Informative message, check

---

It is advisable to attempt to resolve as many as possible of the alerts in all categories. Often the minor alerts point to easily fixed oversights, errors and omissions in your CIF or refinement strategy, so attention to these fine details can be worthwhile. In order to resolve some of the more serious problems it may be necessary to carry out additional measurements or structure refinements. However, the purpose of your study may justify the reported deviations and the more serious of these should normally be commented upon in the discussion or experimental section of a paper or in the "special\_details" fields of the CIF. checkCIF was carefully designed to identify outliers and unusual parameters, but every test has its limitations and alerts that are not important in a particular case may appear. Conversely, the absence of alerts does not guarantee there are no aspects of the results needing attention. It is up to the individual to critically assess their own results and, if necessary, seek expert advice.

### **Publication of your CIF in IUCr journals**

A basic structural check has been run on your CIF. These basic checks will be run on all CIFs submitted for publication in IUCr journals (*Acta Crystallographica*, *Journal of Applied Crystallography*, *Journal of Synchrotron Radiation*); however, if you intend to submit to *Acta Crystallographica Section C* or *E* or *IUCrData*, you should make sure that full publication checks are run on the final version of your CIF prior to submission.

### **Publication of your CIF in other journals**

Please refer to the *Notes for Authors* of the relevant journal for any special instructions relating to CIF submission.

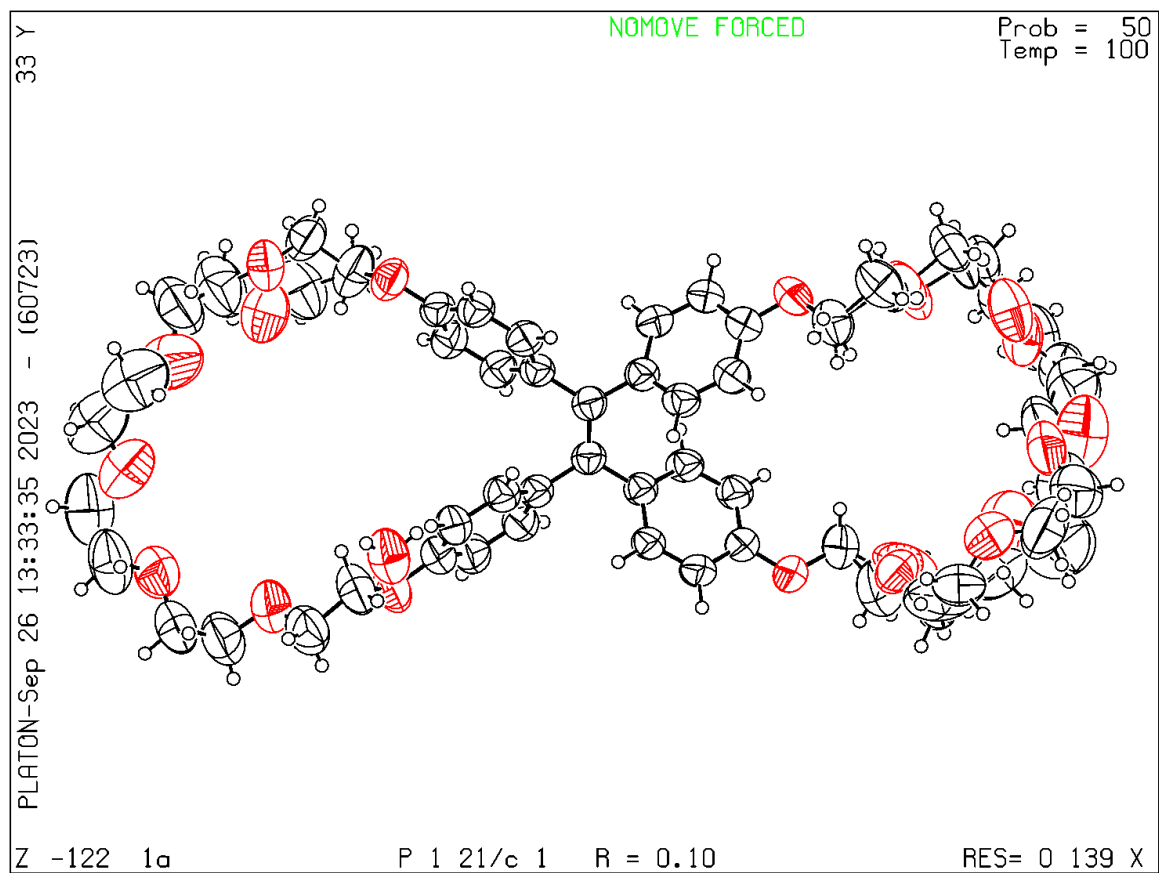

Supplement: Supplementary file 4 [file a21cb773170c67c594708c36.pdf]
