# Supplementary material for: Unprecedented TPE-Embedded Butterfly Bis-Crown Ether with Controllable Conformation and Supramolecular Chiroptical Property
Source: Research Square preprint supplement (doi:10.21203/rs.3.rs-4143303/v2), 2024-04-11

---

The following ALERTS were generated. Each ALERT has the format

**test-name\_ALERT\_alert-type\_alert-level.**

Click on the hyperlinks for more details of the test.

---

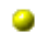

### Alert level C

PLAT042\_ALERT\_1\_C Calc. and Reported MoietyFormula Strings Differ Please Check  
Calc: C42 H48 O10  
Rep.: C21 H24 O5  
PLAT601\_ALERT\_2\_C Unit Cell Contains Solvent Accessible VOIDS of . 54 Ang\*\*3  
PLAT906\_ALERT\_3\_C Large K Value in the Analysis of Variance ..... 2.378 Check  
PLAT911\_ALERT\_3\_C Missing FCF Refl Between Thmin & STh/L= 0.600 13 Report  
2 0 0, -1 1 2, -7 5 2, -1 3 3, -4 0 4, -2 0 4,  
4 0 4, -1 1 4, 4 8 4, -1 1 5, -4 0 6, 8 0 6,  
-6 0 22,

---

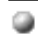

### Alert level G

PLAT045\_ALERT\_1\_G Calculated and Reported Z Differ by a Factor ... 0.500 Check  
PLAT072\_ALERT\_2\_G SHELXL First Parameter in WGHT Unusually Large 0.12 Report  
PLAT720\_ALERT\_4\_G Number of Unusual/Non-Standard Labels ..... 51 Note  
O001 O002 O003 O004 O005 C006 C007 H007  
C008 H00A H00B C009 C00A H00C C00B H00D  
C00C C00D H00E H00F C00E C00F C00G H00G  
C00H H00H C00I H00I C00J H00J C00K C00L  
H00L C00M H00K H00M C00N H00N H00O C00O  
H00P H00Q C00P H00R H00S C00Q H00T H00U  
C00R H00V H00W  
PLAT912\_ALERT\_4\_G Missing # of FCF Reflections Above STh/L= 0.600 21 Note  
PLAT913\_ALERT\_3\_G Missing # of Very Strong Reflections in FCF .... 3 Note  
-1 3 3, -1 1 4, -1 1 5,  
PLAT941\_ALERT\_3\_G Average HKL Measurement Multiplicity ..... 3.7 Low  
PLAT978\_ALERT\_2\_G Number C-C Bonds with Positive Residual Density. 16 Info  
PLAT992\_ALERT\_5\_G Repd & Actual \_reflns\_number\_gt Values Differ by 5 Check

---

0 **ALERT level A** = Most likely a serious problem - resolve or explain  
0 **ALERT level B** = A potentially serious problem, consider carefully  
4 **ALERT level C** = Check. Ensure it is not caused by an omission or oversight  
8 **ALERT level G** = General information/check it is not something unexpected

2 ALERT type 1 CIF construction/syntax error, inconsistent or missing data  
3 ALERT type 2 Indicator that the structure model may be wrong or deficient  
4 ALERT type 3 Indicator that the structure quality may be low  
2 ALERT type 4 Improvement, methodology, query or suggestion  
1 ALERT type 5 Informative message, check

---

---

It is advisable to attempt to resolve as many as possible of the alerts in all categories. Often the minor alerts point to easily fixed oversights, errors and omissions in your CIF or refinement strategy, so attention to these fine details can be worthwhile. In order to resolve some of the more serious problems it may be necessary to carry out additional measurements or structure refinements. However, the purpose of your study may justify the reported deviations and the more serious of these should normally be commented upon in the discussion or experimental section of a paper or in the "special\_details" fields of the CIF. checkCIF was carefully designed to identify outliers and unusual parameters, but every test has its limitations and alerts that are not important in a particular case may appear. Conversely, the absence of alerts does not guarantee there are no aspects of the results needing attention. It is up to the individual to critically assess their own results and, if necessary, seek expert advice.

### **Publication of your CIF in IUCr journals**

A basic structural check has been run on your CIF. These basic checks will be run on all CIFs submitted for publication in IUCr journals (*Acta Crystallographica*, *Journal of Applied Crystallography*, *Journal of Synchrotron Radiation*); however, if you intend to submit to *Acta Crystallographica Section C* or *E* or *IUCrData*, you should make sure that full publication checks are run on the final version of your CIF prior to submission.

### **Publication of your CIF in other journals**

Please refer to the *Notes for Authors* of the relevant journal for any special instructions relating to CIF submission.

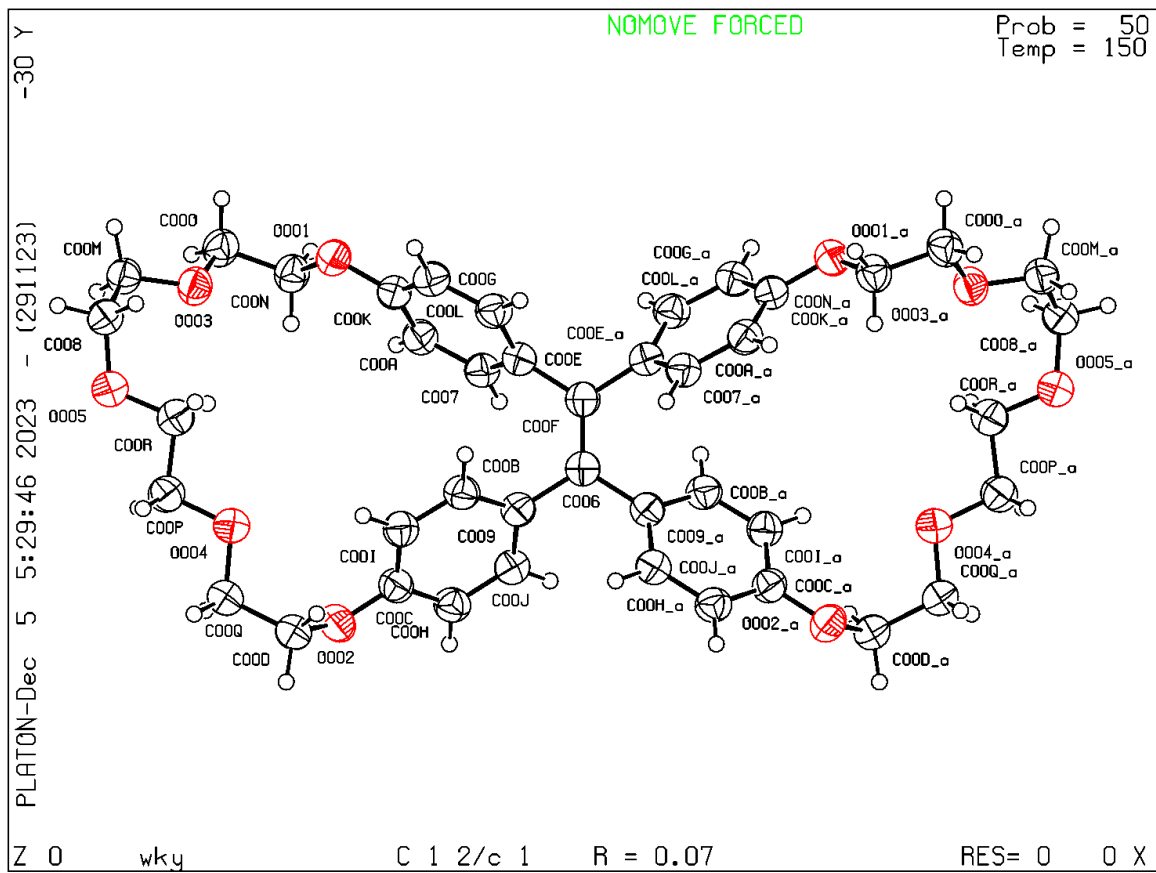

Supplement: Supplementary file 6 [file ff8d2a71a73fc5a350eb792e.pdf]
